# Supplementary material for: Machine learning-driven optimization of the output force in photo-actuated organic crystals
Source: Royal Society of Chemistry journal article supplement (doi:10.1039/d4dd00380b), 2025-01-01
Supplement: d4dd00380b1.xlsx [file d4dd00380b1.xlsx]

## Sheet: Dataset
Compound	SMILES	Method	Density (g/cm3)	E (GPa)	S.E.	Reference
Benzoic acid	C1=CC=C(C=C1)C(=O)O	Nanoindentation	1.382	4.75	0.4	10.1021/acs.cgd.0c01188
p-Iodobenzoic acid	C1=CC(=CC=C1C(=O)O)I	Nanoindentation	2.183	5.88	0.23	10.1021/acs.cgd.0c01188
p-Bromobenzoic acid	C1=CC(=CC=C1C(=O)O)Br	Nanoindentation	1.852	6.88	0.43	10.1021/acs.cgd.0c01188
4-Aminobenzoic acid	C1=CC(=CC=C1C(=O)O)N	Nanoindentation	1.373	7.17	0.25	10.1021/acs.cgd.0c01188
4-nitrobenzoic acid	C1=CC(=CC=C1C(=O)O)[N+](=O)[O-]	Nanoindentation	1.582	5.88	0.25	10.1021/acs.cgd.0c01188
p-Toluic acid	CC1=CC=C(C=C1)C(=O)O	Nanoindentation	1.258	3.17	0.32	10.1021/acs.cgd.0c01188
4-Butoxybenzoic acid	CCCCOC1=CC=C(C=C1)C(=O)O	Nanoindentation	1.202	3.79	0.39	10.1021/acs.cgd.0c01188
α-Glycine	[NH3+]CC([O-])=O	Nanoindentation		44		10.1039/c9ce01874c
L-Alanine	CC(C(=O)O)N	Nanoindentation	1.371	34		10.1039/c9ce01874c
van-cda	NC1=C(Cl)C=C([N+]([O-])=O)C=C1[N+]([O-])=O.OC1=CC=C(C=O)C=C1OC	Nanoindentation	1.601	6.2	0.8	10.1021/cg5018642
evan-cda	NC1=C(Cl)C=C([N+]([O-])=O)C=C1[N+]([O-])=O.OC1=CC=C(C=O)C=C1OCC	Nanoindentation	1.55	6.5	0.3	10.1021/cg5018642
ivan-cda	NC1=C(Cl)C=C([N+]([O-])=O)C=C1[N+]([O-])=O.OC1=CC(C=O)=CC=C1OC	Nanoindentation	1.526	5.5	0.8	10.1021/cg5018642
sb-ovan-cda	NC1=C(Cl)C=C([N+]([O-])=O)C=C1[N+]([O-])=O.OC1=C(/C=N/CC/N=C/C2=CC=CC(OC)=C2O)C=CC=C1OC	Nanoindentation	1.504	4.3	0.2	10.1021/cg5018642
β-Piroxicam	CN1C(=C(C2=CC=CC=C2S1(=O)=O)O)C(=O)NC3=CC=CC=N3	Nanoindentation	1.499	13.09	0.22	10.1021/cg500388s
Saccharin	C1=CC=C2C(=C1)C(=O)NS2(=O)=O	Nanoindentation	1.585	8.93	0.13	10.1021/cg500388s
β-Piroxicam-saccharin cocrystal	CN1C(=C(C2=CC=CC=C2S1(=O)=O)O)C(=O)NC3=CC=CC=N3.C1=CC=C2C(=C1)C(=O)NS2(=O)=O	Nanoindentation	1.525	20.31	1.19	10.1021/cg500388s
Theophylline anhydrate	CN1C2=C(C(=O)N(C1=O)C)NC=N2	Nanoindentation	1.481	11.59	0.27	10.1039/C000614A
Methyl gallate	COC(=O)C1=CC(=C(C(=C1)O)O)O	Nanoindentation	1.481	9.38	0.67	10.1039/C000614A
Theophyline-methyl gallate cocrystal	CN1C2=C(C(=O)N(C1=O)C)NC=N2.COC(=O)C1=CC(=C(C(=C1)O)O)O	Nanoindentation	1.548	15.09	0.92	10.1039/C000614A
ACM Form I	CC(=[NH+]C1=CC=C(C=C1)O)O.O.[Cl-]	Nanoindentation	1.426	16.58		10.1039/C1CE06278F
ACM-HCl	C1=CC(=CC=C1[NH3+])O.[Cl-]	Nanoindentation	1.444	3.59		10.1039/C1CE06278F
DPH-Acs	CN(C)CCOC(C1=CC=CC=C1)C2=CC=CC=C2.CC1=CC(=NS(=O)(=O)O1)[O-]	Nanoindentation	1.351	8.59	0.59	10.1021/acs.cgd.7b01153
DPH-Cit	CN(C)CCOC(C1=CC=CC=C1)C2=CC=CC=C2.C(C(=O)[O-])C(CC(=O)[O-])(C(=O)[O-])O	Nanoindentation	1.319	9.54	0.87	10.1021/acs.cgd.7b01153
DPH-HCl	CN(C)CCOC(C1=CC=CC=C1)C2=CC=CC=C2.[Cl-]	Nanoindentation	1.222	11.91	3.03	10.1021/acs.cgd.7b01153
DPH-Sac	CN(C)CCOC(C1=CC=CC=C1)C2=CC=CC=C2.C1=CC=C2C(=C1)C(=NS2(=O)=O)[O-]	Nanoindentation	1.319	9.5	3.46	10.1021/acs.cgd.7b01153
Metformin-HCl	CN(C)C(=N)N=C(N)N.[Cl-]	Nanoindentation		20.4	0.97	10.1016/j.ijpharm.2017.08.100
Metformin-Acesulfame salt	CN(C)C(=N)N=C(N)N.CC1=CC(=O)NS(=O)(=O)O1	Nanoindentation	1.412	9.36	0.6	10.1016/j.ijpharm.2017.08.100
α-Lactose monohydrate	C([C@@H]1[C@@H]([C@@H]([C@H]([C@@H](O1)O[C@@H]2[C@H](O[C@@H]([C@@H]([C@H]2O)O)O)CO)O)O)O)O.O	Nanoindentation	1.54	21.44	0.9648	10.1016/j.powtec.2008.05.009
Acetylsalicylic acid	CC(=O)OC1=CC=CC=C1C(=O)O	Nanoindentation	1.4	5.44	0.27744	10.1016/j.powtec.2008.05.009
Citric acid monohydrate	C(C(=O)O)C(CC(=O)O)(C(=O)O)O.O	Nanoindentation	1.65	16.38	1.35954	10.1016/j.powtec.2008.05.009
Ascorbic acid	C(C(C1C(=C(C(=O)O1)O)O)O)O	Nanoindentation	1.65	34.46	1.75746	10.1016/j.powtec.2008.05.009
Sucrose	C(C1C(C(C(C(O1)OC2(C(C(C(O2)CO)O)O)CO)O)O)O)O	Nanoindentation	1.586	23.97	1.51011	10.1016/j.powtec.2008.05.009
Tartaric acid	C(C(C(=O)O)O)(C(=O)O)O	Nanoindentation	1.76	43.34	0.6501	10.1016/j.powtec.2008.05.009
Glycine	C(C(=O)O)N	Nanoindentation	1.595	23.56	1.08376	10.1016/j.powtec.2008.05.009
Calcium fumarate trihydrate	C(=CC(=O)[O-])C(=O)[O-].O.O.O.[Ca+2]	Nanoindentation	1.706	33.3		10.1021/acs.inorgchem.5b01466
Calcium fumarate trihydrate	C(=CC(=O)[O-])C(=O)[O-].O.O.O.[Ca+2]	Nanoindentation	1.706	16.7		10.1021/acs.inorgchem.5b01466
Calcium fumarate trihydrate	C(=CC(=O)[O-])C(=O)[O-].O.O.O.[Ca+2]	Nanoindentation	1.706	24.9		10.1021/acs.inorgchem.5b01466
Aspirin Form I	CC(=O)OC1=CC=CC=C1C(=O)O	Nanoindentation	1.401	5.97	0.291	10.1039/C1SC00430A
Aspirin Form I	CC(=O)OC1=CC=CC=C1C(=O)O	Nanoindentation	1.401	9.57	0.201	10.1039/C1SC00430A
Aspirin Form II	CC(=O)OC1=CC=CC=C1C(=O)O	Nanoindentation	1.395	4.96	0.226	10.1039/C1SC00430A
Caffeine 4-chloro-3-nitrobenzoic acid Form I	CN1C=NC2=C1C(=O)N(C(=O)N2C)C.C1=CC(=C(C=C1C(=O)O)[N+](=O)[O-])Cl	Nanoindentation	1.522	7.86	0.028	10.1021/cg400928v
Caffeine 4-chloro-3-nitrobenzoic acid Form 2	CN1C=NC2=C1C(=O)N(C(=O)N2C)C.C1=CC(=C(C=C1C(=O)O)[N+](=O)[O-])Cl	Nanoindentation	1.528	6.715	0.009	10.1021/cg400928v
Caffeine 4-chloro-3-nitrobenzoic acid Form 2	CN1C=NC2=C1C(=O)N(C(=O)N2C)C.C1=CC(=C(C=C1C(=O)O)[N+](=O)[O-])Cl	Nanoindentation	1.528	4.92	0.005	10.1021/cg400928v
Piroxicam Form I	CN1C(=C(C2=CC=CC=C2S1(=O)=O)O)C(=O)NC3=CC=CC=N3	Nanoindentation	1.475	11.9	2.8	10.1007/s11095-014-1475-3
Piroxicam Form I	CN1C(=C(C2=CC=CC=C2S1(=O)=O)O)C(=O)NC3=CC=CC=N3	Nanoindentation	1.475	12.8	0.04	10.1007/s11095-014-1475-3
Piroxicam Form I	CN1C(=C(C2=CC=CC=C2S1(=O)=O)O)C(=O)NC3=CC=CC=N3	Nanoindentation	1.475	14.6	0.3	10.1007/s11095-014-1475-3
Famotidine Form A	C1=C(N=C(S1)N=C(N)N)CSCCC(=NS(=O)(=O)N)N	Nanoindentation	1.595	22.6	2	10.1007/s11095-014-1475-3
Famotidine Form A	C1=C(N=C(S1)N=C(N)N)CSCCC(=NS(=O)(=O)N)N	Nanoindentation	1.595	20.1	1.2	10.1007/s11095-014-1475-3
Famotidine Form B	C1=C(N=C(S1)N=C(N)N)CSCCC(=NS(=O)(=O)N)N	Nanoindentation	1.561	19.5	0.4	10.1007/s11095-014-1475-3
Nifedipine Form α	CC1=C(C(C(=C(N1)C)C(=O)OC)C2=CC=CC=C2[N+](=O)[O-])C(=O)OC	Nanoindentation	1.378	13.8	6.9	10.1007/s11095-014-1475-3
Olanzapine Form I	CC1=CC2=C(S1)NC3=CC=CC=C3N=C2N4CCN(CC4)C	Nanoindentation	1.334	14.8	0.4	10.1007/s11095-014-1475-3
Olanzapine Form I	CC1=CC2=C(S1)NC3=CC=CC=C3N=C2N4CCN(CC4)C	Nanoindentation	1.334	13.2	0.3	10.1007/s11095-014-1475-3
Succinic acid	C(CC(=O)O)C(=O)O	Nanoindentation		14.01		10.1021/ja402290h
Glutaric acid	C(CC(=O)O)CC(=O)O	Nanoindentation		7.28		10.1021/ja402290h
Adipic acid	C(CCC(=O)O)CC(=O)O	Nanoindentation		11.53		10.1021/ja402290h
Pimelic acid	C(CCC(=O)O)CCC(=O)O	Nanoindentation		8.23		10.1021/ja402290h
Suberic acid	C(CCCC(=O)O)CCC(=O)O	Nanoindentation		9.64		10.1021/ja402290h
Azelaic acid	C(CCCC(=O)O)CCCC(=O)O	Nanoindentation		8.28		10.1021/ja402290h
Malonic acid	C(C(=O)O)C(=O)O	Nanoindentation		9.13		10.1021/ja402290h
Felodipine Form I	CCOC(=O)C1=C(NC(=C(C1C2=C(C(=CC=C2)Cl)Cl)C(=O)OC)C)C	Nanoindentation	1.43	12.81	0.19	10.1002/ange.201406898
Felodipine Form II	CCOC(=O)C1=C(NC(=C(C1C2=C(C(=CC=C2)Cl)Cl)C(=O)OC)C)C	Nanoindentation	1.43	6.24	0.18	10.1002/ange.201406898
Felodipine Form II	CCOC(=O)C1=C(NC(=C(C1C2=C(C(=CC=C2)Cl)Cl)C(=O)OC)C)C	Nanoindentation	1.43	6.19	0.25	10.1002/ange.201406898
Felodipine Form II	CCOC(=O)C1=C(NC(=C(C1C2=C(C(=CC=C2)Cl)Cl)C(=O)OC)C)C	Nanoindentation	1.43	4.29	0.13	10.1002/ange.201406898
Felodipine Form III	CCOC(=O)C1=C(NC(=C(C1C2=C(C(=CC=C2)Cl)Cl)C(=O)OC)C)C	Nanoindentation	1.43	10.47	0.19	10.1002/ange.201406898
2-((R)-2-methylpyrrolidin-2-yl)-1H-benzimidazole-4-carboxamide crystalline form 1	CC1(CCCN1)C2=NC3=C(C=CC=C3N2)C(=O)N	Nanoindentation		10.4		10.1002/jps.24178
Sphingosine-1-phosphate receptor agonists	O[C@@]1([NH3+])CC[C@H](C2=CC=C(CCCCCCCOC)C=C2)C1.[O-]C([C@@H](O)C3=CC=CC=C3)=O	Nanoindentation		2.7		10.1002/jps.24178
Sucrose	C(C1C(C(C(C(O1)OC2(C(C(C(O2)CO)O)O)CO)O)O)O)O	Nanoindentation		38.2	0.4	10.1557/jmr.2007.0249
Sucrose	C(C1C(C(C(C(O1)OC2(C(C(C(O2)CO)O)O)CO)O)O)O)O	Nanoindentation		33	1.1	10.1557/jmr.2007.0249
VOR	CC(C1=NC=NC=C1F)C(CN2C=NC=N2)(C3=C(C=C(C=C3)F)F)OS(=O)(=O)CC45CCC(C4(C)C)CC5=O	Nanoindentation	1.442	3.79	0.17	10.1021/mp500719t
VOR-HCl	CC(C1=NC=NC=C1F)C(CN2C=NC=N2)(C3=C(C=C(C=C3)F)F)OS(=O)(=O)CC45CCC(C4(C)C)CC5=O.Cl	Nanoindentation	1.586	19.41	0.13	10.1021/mp500719t
VOR-OXA Form I	CC(C1=NC=NC=C1F)C(CN2C=NC=N2)(C3=C(C=C(C=C3)F)F)OS(=O)(=O)CC45CCC(C4(C)C)CC5=O.C(=O)(C(=O)[O-])[O-]	Nanoindentation	1.533	5.95	0.1	10.1021/mp500719t
VOR-OXA Form II	CC(C1=NC=NC=C1F)C(CN2C=NC=N2)(C3=C(C=C(C=C3)F)F)OS(=O)(=O)CC45CCC(C4(C)C)CC5=O.C(=O)(C(=O)[O-])[O-]	Nanoindentation	1.53	8.29	0.25	10.1021/mp500719t
VOR-Fum	CC(C1=NC=NC=C1F)C(CN2C=NC=N2)(C3=C(C=C(C=C3)F)F)OS(=O)(=O)CC45CCC(C4(C)C)CC5=O.C(=CC(=O)O)C(=O)O	Nanoindentation	1.491	5.79	0.26	10.1021/mp500719t
VOR-PAB	CC(C1=NC=NC=C1F)C(CN2C=NC=N2)(C3=C(C=C(C=C3)F)F)OS(=O)(=O)CC45CCC(C4(C)C)CC5=O.C1=CC(=CC=C1C(=O)O)O	Nanoindentation	1.478	5.63	0.35	10.1021/mp500719t
VOR-PHB	CC(C1=NC=NC=C1F)C(CN2C=NC=N2)(C3=C(C=C(C=C3)F)F)OS(=O)(=O)CC45CCC(C4(C)C)CC5=O.C1=CC(=CC=C1C(=O)O)N	Nanoindentation	1.438	5.64	0.21	10.1021/mp500719t
Omeprazole Form I	CC1=CN=C(CS(C2=NC3=C(C=CC(OC)=C3)N2)=O)C(C)=C1OC	Nanoindentation	1.381	12.02	0.35	10.1021/ja512817f
Omeprazole Form II	CC1=CN=C(C(=C1OC)C)CS(=O)C2=NC3=C(N2)C=C(C=C3)OC.CC1=CN=C(CS(C2=NC3=C(C=CC(OC)=C3)N2)=O)C(C)=C1OC	Nanoindentation	1.366	12.14	0.37	10.1021/ja512817f
Omeprazole Form III	CC1=CN=C(C(=C1OC)C)CS(=O)C2=NC3=C(N2)C=C(C=C3)OC.CC1=CN=C(CS(C2=NC3=C(C=CC(OC)=C3)N2)=O)C(C)=C1OC	Nanoindentation	1.376	12.2	0.2	10.1021/ja512817f
Omeprazole Form IV	CC1=CN=C(C(=C1OC)C)CS(=O)C2=NC3=C(N2)C=C(C=C3)OC.CC1=CN=C(CS(C2=NC3=C(C=CC(OC)=C3)N2)=O)C(C)=C1OC	Nanoindentation	1.373	12.38	0.3	10.1021/ja512817f
Omeprazole Form V	CC1=CN=C(C(=C1OC)C)CS(=O)C2=NC3=C(N2)C=C(C=C3)OC.CC1=CN=C(CS(C2=NC3=C(C=CC(OC)=C3)N2)=O)C(C)=C1OC	Nanoindentation	1.326	13.32	0.41	10.1021/ja512817f
Saccharin	C1=CC=C2C(=C1)C(=O)NS2(=O)=O	Nanoindentation	1.603	13.94	0.07	10.1021/acs.cgd.5b00245
Sulfathiazole	C1=CC(=CC=C1N)S(=O)(=O)NC2=NC=CS2	Nanoindentation	1.575	21.88	0.22	10.1021/acs.cgd.5b00245
L-Alanine	CC(C(=O)O)N	Nanoindentation	1.62	25.1	0.72	10.1021/acs.cgd.5b00245
Curcumin Form I	COC1=C(C=CC(=C1)C=CC(=O)CC(=O)C=CC2=CC(=C(C=C2)O)OC)O	Nanoindentation	1.39	11.15	0.2	10.1021/cg500305n
Curcumin Form II	COC1=C(C=CC(=C1)C=CC(=O)CC(=O)C=CC2=CC(=C(C=C2)O)OC)O	Nanoindentation	1.404	5.68	0.25	10.1021/cg500305n
Curcumin Form III	COC1=C(C=CC(=C1)C=CC(=O)CC(=O)C=CC2=CC(=C(C=C2)O)OC)O	Nanoindentation	1.417	5.6	0.29	10.1021/cg500305n
Sulfathiazole Form I	C1=CC(=CC=C1N)S(=O)(=O)NC2=NC=CS2	Nanoindentation	1.5	10.01	0.19	10.1021/cg500305n
Sulfathiazole Form II	C1=CC(=CC=C1N)S(=O)(=O)NC2=NC=CS2	Nanoindentation	1.551	20.44	0.25	10.1021/cg500305n
Sulfathiazole Form III	C1=CC(=CC=C1N)S(=O)(=O)NC2=NC=CS2	Nanoindentation	1.569	16.42	0.3	10.1021/cg500305n
Sulfathiazole Form IV	C1=CC(=CC=C1N)S(=O)(=O)NC2=NC=CS2	Nanoindentation	1.595	17.31	0.21	10.1021/cg500305n
Febuxostat Form Q	CC1=C(SC(=N1)C2=CC(=C(C=C2)OCC(C)C)C#N)C(=O)O	Nanoindentation	1.311	2.743	0.16	10.1021/acs.molpharmaceut.6b01075
Febuxostat Form H1	CC1=C(SC(=N1)C2=CC(=C(C=C2)OCC(C)C)C#N)C(=O)O	Nanoindentation	1.235	4.51	0.631	10.1021/acs.molpharmaceut.6b01075
Sildenafil citrate	CCCC1=NN(C2=C1N=C(NC2=O)C3=C(C=CC(=C3)S(=O)(=O)N4CCN(CC4)C)OCC)C.C(C(=O)O)C(CC(=O)O)(C(=O)O)O	Nanoindentation		13.9	1.5	10.1021/op0300241
Voriconazole	CC(C1=NC=NC=C1F)C(CN2C=NC=N2)(C3=C(C=C(C=C3)F)F)O	Nanoindentation		3.7	0.4	10.1021/op0300241
(R)-3-((S)-1-((S)-2-methoxy-1-phenylethylamino)-3,3-dimethyl-1-oxobutan-2-ylcarbamoyl)-6-(2-methyl biphenyl-4-yl)hexanoic acid	CC(C=C(CCC[C@@H](C(N[C@@H](C(C)(C)C)C(N[C@H](COC)C1=CC=CC=C1)=O)=O)CC(O)=O)C=C2)=C2C3=CC=CC=C3	Nanoindentation		2.9	0.4	10.1021/op0300241
Slidenafil derivative	O=C(N1)C2=NN(CCOC)C(CC)=C2N=C1C3=C(OCC)N=CC(S(N4CCN(CC)CC4)=S=O)=C3	Nanoindentation		7.6	0.5	10.1021/op0300241
Voriconazole	CC(C1=NC=NC=C1F)C(CN2C=NC=N2)(C3=C(C=C(C=C3)F)F)O	Nanoindentation		3.5	0.3	10.1016/j.powtec.2004.04.012
Voriconazole	CC(C1=NC=NC=C1F)C(CN2C=NC=N2)(C3=C(C=C(C=C3)F)F)O	Nanoindentation		4.5	0.2	10.1016/j.powtec.2004.04.012
Voriconazole	CC(C1=NC=NC=C1F)C(CN2C=NC=N2)(C3=C(C=C(C=C3)F)F)O	Nanoindentation		4.3	1.1	10.1016/j.powtec.2004.04.012
1,2,4,5-tetracyanobenzene with pyrene	C1=C(C(=CC(=C1C#N)C#N)C#N)C#N.C1=CC2=C3C(=C1)C=CC4=CC=CC(=C43)C=C2	Nanoindentation	1.357	4.98	0.249	10.1002/asia.201200224
1,2,4,5-tetracyanobenzene with pyrene	C1=C(C(=CC(=C1C#N)C#N)C#N)C#N.C1=CC2=C3C(=C1)C=CC4=CC=CC(=C43)C=C2	Nanoindentation	1.357	3.92	0.054	10.1002/asia.201200224
1,2,4,5-tetracyanobenzene with phenanthrene	C1=C(C(=CC(=C1C#N)C#N)C#N)C#N.C1=CC2=C3C(=C1)C=CC4=CC=CC(=C43)C=C2	Nanoindentation	1.349	5.76	0.115	10.1002/asia.201200224
1,2,4,5-tetracyanobenzene with phenanthrene	C1=C(C(=CC(=C1C#N)C#N)C#N)C#N.C1=CC2=C3C(=C1)C=CC4=CC=CC(=C43)C=C2	Nanoindentation	1.349	4.59	0.081	10.1002/asia.201200224
Sodium saccharin dihydrate	C1=CC=C2C(=C1)C(=O)[N-]S2(=O)=O.O.O.[Na+]	Nanoindentation	1.661	18.4		10.1039/C1CE05656E
Sodium saccharin dihydrate	C1=CC=C2C(=C1)C(=O)[N-]S2(=O)=O.O.O.[Na+]	Nanoindentation	1.661	15.88		10.1039/C1CE05656E
Sodium saccharin dihydrate after 35h	C1=CC=C2C(=C1)C(=O)[N-]S2(=O)=O.O.O.[Na+]	Nanoindentation	1.661	21.2		10.1039/C1CE05656E
Sodium saccharin dihydrate after 35h	C1=CC=C2C(=C1)C(=O)[N-]S2(=O)=O.O.O.[Na+]	Nanoindentation	1.661	16.35		10.1039/C1CE05656E
Caffeine-glutaric acid Form I	CN1C=NC2=C1C(=O)N(C(=O)N2C)CC(CCC(=O)O)C(=O)O	Nanoindentation		8.51	0.56	10.1039/C6CE01096B
Caffeine-glutaric acid Form II	CN1C=NC2=C1C(=O)N(C(=O)N2C)CC(CCC(=O)O)C(=O)O	Nanoindentation		9.14	0.95	10.1039/C6CE01096B
Saccharin	C1=CC=C2C(=C1)C(=O)NS2(=O)=O	Nanoindentation	1.624	14.01	0.03	10.1021/cg1009362
Saccharin	C1=CC=C2C(=C1)C(=O)NS2(=O)=O	Nanoindentation	1.624	13.36	0.05	10.1021/cg1009362
Saccharin	C1=CC=C2C(=C1)C(=O)NS2(=O)=O	Nanoindentation		13.9		10.1039/C5RA11656B
Saccharin	C1=CC=C2C(=C1)C(=O)NS2(=O)=O	Nanoindentation		14		10.1039/C5RA11656B
L-Alanine	CC(C(=O)O)N	Nanoindentation		25.1		10.1039/C5RA11656B
L-Alanine	CC(C(=O)O)N	Nanoindentation		19.2		10.1039/C5RA11656B
Griseofulvin	CC1CC(=O)C=C(C12C(=O)C3=C(O2)C(=C(C=C3OC)OC)Cl)OC	Nanoindentation	1.46	12.42	0.711	10.1016/j.ijpharm.2015.03.062
Griseofulvin	CC1CC(=O)C=C(C12C(=O)C3=C(O2)C(=C(C=C3OC)OC)Cl)OC	Nanoindentation	1.46	11.43	3.56	10.1016/j.ijpharm.2015.03.062
Griseofulvin	CC1CC(=O)C=C(C12C(=O)C3=C(O2)C(=C(C=C3OC)OC)Cl)OC	Nanoindentation	1.46	11.53	2.62	10.1016/j.ijpharm.2015.03.062
Griseofulvin	CC1CC(=O)C=C(C12C(=O)C3=C(O2)C(=C(C=C3OC)OC)Cl)OC	Nanoindentation	1.46	12.73	0.71	10.1016/j.ijpharm.2015.03.062
Griseofulvin	CC1CC(=O)C=C(C12C(=O)C3=C(O2)C(=C(C=C3OC)OC)Cl)OC	Nanoindentation	1.46	12.5	0.72	10.1016/j.ijpharm.2015.03.062
α-Glycine	C(C(=O)[O-])[NH3+]	Nanoindentation	1.613	26		10.1002/anie.201505813
α-Glycine	C(C(=O)[O-])[NH3+]	Nanoindentation	1.613	29		10.1002/anie.201505813
α-Glycine	C(C(=O)[O-])[NH3+]	Nanoindentation	1.613	33		10.1002/anie.201505813
α-Glycine	C(C(=O)[O-])[NH3+]	Nanoindentation	1.613	44		10.1002/anie.201505813
γ-Glycine	C(C(=O)[O-])[NH3+]	Nanoindentation	1.584	28		10.1002/anie.201505813
L-Alanine	CC(C(=O)O)N	Nanoindentation	1.405	21.2		10.1002/anie.201505813
L-Alanine	CC(C(=O)O)N	Nanoindentation	1.405	20.8		10.1002/anie.201505813
L-Alanine	CC(C(=O)O)N	Nanoindentation	1.405	34.4		10.1002/anie.201505813
DL-Serine	C(C(C(=O)O)N)O	Nanoindentation	1.538	23.1		10.1002/anie.201505813
Glycylglycine	C(C(=O)NCC(=O)O)N	Nanoindentation	1.51	26		10.1002/anie.201505813
Cyclotrimethylene	C1N(CN(CN1[N+](=O)[O-])[N+](=O)[O-])[N+](=O)[O-]	Nanoindentation		21	0.6	10.1080/14786430903120335
Cyclotrimethylene	C1N(CN(CN1[N+](=O)[O-])[N+](=O)[O-])[N+](=O)[O-]	Nanoindentation		18.2	0.6	10.1080/14786430903120335
Cyclotrimethylene	C1N(CN(CN1[N+](=O)[O-])[N+](=O)[O-])[N+](=O)[O-]	Nanoindentation		16.2	1	10.1080/14786430903120335
Aspirin	CC(=O)OC1=CC=CC=C1C(=O)O	Nanoindentation		2.96	0.13	10.1016/j.ijpharm.2011.03.039
Aspirin	CC(=O)OC1=CC=CC=C1C(=O)O	Nanoindentation		5.17	0.72	10.1016/j.ijpharm.2011.03.039
Hexachlorobenzene	C1(=C(C(=C(C(=C1Cl)Cl)Cl)Cl)Cl)Cl	Nanoindentation	2.066	3.66		10.1038/nchem.2123
Hexachlorobenzene	C1(=C(C(=C(C(=C1Cl)Cl)Cl)Cl)Cl)Cl	Nanoindentation	2.066	4.82		10.1038/nchem.2123
Hexachlorobenzene	C1(=C(C(=C(C(=C1Cl)Cl)Cl)Cl)Cl)Cl	Nanoindentation	2.066	0.6		10.1038/nchem.2123
Hexachlorobenzene	C1(=C(C(=C(C(=C1Cl)Cl)Cl)Cl)Cl)Cl	Nanoindentation	2.066	5.3		10.1038/nchem.2123
Hexachlorobenzene	C1(=C(C(=C(C(=C1Cl)Cl)Cl)Cl)Cl)Cl	Nanoindentation	2.066	0.272		10.1038/nchem.2123
β-HMX	C1N(CN(CN(CN1[N+](=O)[O-])[N+](=O)[O-])[N+](=O)[O-])[N+](=O)[O-]	Nanoindentation	1.903	23.2	1.15	10.1002/prep.201000018
β-HMX	C1N(CN(CN(CN1[N+](=O)[O-])[N+](=O)[O-])[N+](=O)[O-])[N+](=O)[O-]	Nanoindentation	1.903	26.1	2.91	10.1002/prep.201000018
LLM-105	C1(=C(N=C(C(=[N+]1[O-])N)[N+](=O)[O-])N(O)[O])N	Nanoindentation		20.5		10.1088/2053-1591/1/2/025036
β-HMX	C1N(CN(CN(CN1[N+](=O)[O-])[N+](=O)[O-])[N+](=O)[O-])[N+](=O)[O-]	Nanoindentation		17.6		10.1088/2053-1591/1/2/025036
Fluorinated Amide Form1	C1=CC(=C(C=C1F)F)C(=O)NC2=CC(=CC(=C2)F)F	Nanoindentation	1.627	8.36	0.477	10.1002/chem.201604711
Fluorinated Amide Form2	C1=CC(=C(C=C1F)F)C(=O)NC2=CC(=CC(=C2)F)F	Nanoindentation	1.616	6.17	0.243	10.1002/chem.201604711
1,1-Diamino-2,2-dinitroethylene	C(=C([N+](=O)[O-])[N+](=O)[O-])(N)N	Nanoindentation		11.09	0.83	10.1021/acs.jpcc.6b04612
1,1-Diamino-2,2-dinitroethylene	C(=C([N+](=O)[O-])[N+](=O)[O-])(N)N	Nanoindentation		16.65	0.79	10.1021/acs.jpcc.6b04612
1,1-Diamino-2,2-dinitroethylene	C(=C([N+](=O)[O-])[N+](=O)[O-])(N)N	Nanoindentation		21.34	1.01	10.1021/acs.jpcc.6b04612
1,2,4,5-Tetrabromobenzene	C1=C(C(=CC(=C1Br)Br)Br)Br	Nanoindentation	3.015	6.431	0.124	10.1021/ja4056323
Piroxicam	CN1C(=C(C2=CC=CC=C2S1(=O)=O)O)C(=O)NC3=CC=CC=N3	Nanoindentation		17.16	0.4	10.1007/s11837-016-2169-6
Piroxicam	CN1C(=C(C2=CC=CC=C2S1(=O)=O)O)C(=O)NC3=CC=CC=N3	Nanoindentation		16.1	0.9	10.1007/s11837-016-2169-6
Cyclotrimethylenetrinitramine	C1N(CN(CN1[N+](=O)[O-])[N+](=O)[O-])[N+](=O)[O-]	Nanoindentation		19.1	1.9	10.1002/prep.201600143
Acesulfame acid	CC1=CC(=O)NS(=O)(=O)O1	Nanoindentation	1.643	4.2	0.75	10.1021/acs.molpharmaceut.9b00247
Acesulfame K	CC1=CC(=O)[N-]S(=O)(=O)O1.[K+]	Nanoindentation	1.841	14.9	0.6	10.1021/acs.molpharmaceut.9b00247
Glucose derivative Form I	OC(C(SC1=CC=C(C)C=C1)O2)C(O)C(O)C2COC(C3=CC=CC=C3)=O	Nanoindentation	1.384	4.3		10.1021/acs.cgd.6b01749
Glucose derivative Form I	OC(C(SC1=CC=C(C)C=C1)O2)C(O)C(O)C2COC(C3=CC=CC=C3)=O	Nanoindentation	1.384	4.57		10.1021/acs.cgd.6b01749
Glucose derivative Form II	OC(C(SC1=CC=C(C)C=C1)O2)C(O)C(O)C2COC(C3=CC=CC=C3)=O	Nanoindentation	1.38	5.8		10.1021/acs.cgd.6b01749
Oxalic acid dihydrate	C(=O)(C(=O)O)O.O.O	Nanoindentation	1.639	18.81	0.96	10.1021/acs.molpharmaceut.9b00082
Aspirin	CC(=O)OC1=CC=CC=C1C(=O)O	Nanoindentation		7.2		10.1557/jmr.2017.219
HMX	C1N(CN(CN(CN1[N+](=O)[O-])[N+](=O)[O-])[N+](=O)[O-])[N+](=O)[O-]	Nanoindentation		24.5		10.1557/jmr.2017.219
TATB	C1(=C(C(=C(C(=C1[N+](=O)[O-])N)[N+](=O)[O-])N)[N+](=O)[O-])N	Nanoindentation		9.6	1.5	10.1557/jmr.2017.219
TNT/CL-20	CC1=C(C=C(C=C1[N+](=O)[O-])[N+](=O)[O-])[N+](=O)[O-].C12C3N(C4C(N3[N+](=O)[O-])N(C(N1[N+](=O)[O-])C(N2[N+](=O)[O-])N4[N+](=O)[O-])[N+](=O)[O-])[N+](=O)[O-]	Nanoindentation		14.2	1.2	10.1557/jmr.2017.219
FOX-7	C(=C([N+](=O)[O-])[N+](=O)[O-])(N)N	Nanoindentation		19.6	4	10.1557/jmr.2017.219
ADAAF	C1=CON=C1N=[N+](NN=NN)[O-]	Nanoindentation		6.7	1.3	10.1557/jmr.2017.219
RDX	C1N(CN(CN1[N+](=O)[O-])[N+](=O)[O-])[N+](=O)[O-]	Nanoindentation		19.1		10.1557/jmr.2017.219
N‑(3-Ethynylphenyl)-3-fluorobenzamide Form I	C#CC1=CC(=CC=C1)NC(=O)C2=CC(=CC=C2)F	Nanoindentation	1371	10.66	0.69	10.1021/acs.cgd.7b01432
N‑(3-Ethynylphenyl)-3-fluorobenzamide Form II	C#CC1=CC(=CC=C1)NC(=O)C2=CC(=CC=C2)F	Nanoindentation	1353	4.91	0.14	10.1021/acs.cgd.7b01432
N‑(3-Ethynylphenyl)-3-fluorobenzamide Form III	C#CC1=CC(=CC=C1)NC(=O)C2=CC(=CC=C2)F	Nanoindentation	1388	12.89	0.16	10.1021/acs.cgd.7b01432
3-((4-Chlorophenyl)imino)-indolin-2-one Form III	C1=CC=C2C(=C1)C(=NC3=CC=C(C=C3)Cl)C(=O)N2	Nanoindentation	1.447	8.09	0.2	10.1021/acs.cgd.8b00261
3-((4-Chlorophenyl)imino)-indolin-2-one Form III	C1=CC=C2C(=C1)C(=NC3=CC=C(C=C3)Cl)C(=O)N2	Nanoindentation	1.491	3.54	0.05	10.1021/acs.cgd.8b00261
3-((4-Chlorophenyl)imino)-indolin-2-one Form III	C1=CC=C2C(=C1)C(=NC3=CC=C(C=C3)Cl)C(=O)N2	Nanoindentation	1.437	11.5	1.2	10.1021/acs.cgd.8b00261
1-(2,5-Dichlorophenyl)-N-(4-iodophenyl)methanimine	IC1=CC=C(/N=C/C2=CC(Cl)=CC=C2Cl)C=C1	Nanoindentation	1.944	12.76	0.82	10.1039/C8CC04132F
1-(4-Chlorophenyl)-N-(4-fluoro-3-nitrophenyl)methanimine	FC1=CC=C(/N=C/C2=CC=C(Cl)C=C2)C=C1[N+]([O-])=O	Nanoindentation	1.552	8.43	0.31	10.1039/C8CC04132F
(E)-N-(3,4-Dichlorophenyl)-1-(3,4,5-trimethoxyphenyl)methanimine	ClC1=CC=C(/N=C/C2=CC(OC)=C(OC)C(OC)=C2)C=C1Cl	Nanoindentation	1.477	12.54	0.33	10.1039/C8CC04132F
Sulfapyridine	C1=CC=NC(=C1)NS(=O)(=O)C2=CC=C(C=C2)N	Nanoindentation	1.439	15.69	0.726	10.1002/chem.201803987
Sulfachloropyridazine	C1=CC(=CC=C1N)S(=O)(=O)NC2=NN=C(C=C2)Cl	Nanoindentation	1.583	15.5	1.1	10.1002/chem.201803987
Sulfadiazine	C1=CN=C(N=C1)NS(=O)(=O)C2=CC=C(C=C2)N	Nanoindentation	1.558	7.69	0.5	10.1002/chem.201803987
Sulfamerazine	CC1=NC(=NC=C1)NS(=O)(=O)C2=CC=C(C=C2)N	Nanoindentation	1.433	9.54	0.86	10.1002/chem.201803987
Sulfameter	COC1=CN=C(N=C1)NS(=O)(=O)C2=CC=C(C=C2)N	Nanoindentation	1.493	5.71	0.18	10.1002/chem.201803987
Sulfadoxine	COC1=C(N=CN=C1OC)NS(=O)(=O)C2=CC=C(C=C2)N	Nanoindentation	1.463	14.74	0.168	10.1002/chem.201803987
Sulfamethoxazole	CC1=CC(=NO1)NS(=O)(=O)C2=CC=C(C=C2)N	Nanoindentation	1.415	13.74	0.498	10.1002/chem.201803987
Sulfathiazole	C1=CC(=CC=C1N)S(=O)(=O)NC2=NC=CS2	Nanoindentation	1.603	20.44	0.25	10.1002/chem.201803987
Celecoxib Form III	CC1=CC=C(C=C1)C2=CC(=NN2C3=CC=C(C=C3)S(=O)(=O)N)C(F)(F)F	Nanoindentation	1.549	16.27		10.1021/acs.chemmater.9b00040
INZ-BA	C1=CN=CC=C1C(=O)NN.C1=CC=C(C=C1)C(=O)O	Nanoindentation	1.4	23.265		10.1021/acs.cgd.9b00247
INZ-2HBA	C1=CN=CC=C1C(=O)NN.C1=CC=C(C(=C1)C(=O)O)O	Nanoindentation	1.454	8.162		10.1021/acs.cgd.9b00247
INZ-4HBA	C1=CN=CC=C1C(=O)NN.C1=CC(=CC=C1CO)O	Nanoindentation	1.397	5.782		10.1021/acs.cgd.9b00247
INZ-GA	C1=CN=CC=C1C(=O)NN.C1=C(C=C(C(=C1O)O)O)C(=O)O	Nanoindentation	1.572	6.967		10.1021/acs.cgd.9b00247
Substituted dihydropyrimidinone Form I	CC(N1)=C(C(OC)=O)C(C2=CC=C(C(F)(F)F)C=C2)NC1=O	Nanoindentation	1.515	2.62	0.37	10.1002/asia.201801842
Substituted dihydropyrimidinone Form I	CC(N1)=C(C(OC)=O)C(C2=CC=C(C(F)(F)F)C=C2)NC1=O	Nanoindentation	1.515	1.3	0.15	10.1002/asia.201801842
Substituted dihydropyrimidinone Form II	CC(N1)=C(C(OCC2=CN(C3=CC=C(C(F)(F)F)C=C3)N=N2)=O)C(C4=CC=C(Cl)C=C4)NC1=O	Nanoindentation	1.535	14.94	0.55	10.1002/asia.201801842
Substituted dihydropyrimidinone Form II	CC(N1)=C(C(OCC2=CN(C3=CC=C(C(F)(F)F)C=C3)N=N2)=O)C(C4=CC=C(Cl)C=C4)NC1=O	Nanoindentation	1.535	7.14	0.42	10.1002/asia.201801842
N,N'-Dimethyl-1,4,5,8-naphthalenetetracarboxylic diimide	CN1C(=O)C2=C3C(=CC=C4C3=C(C=C2)C(=O)N(C4=O)C)C1=O	Nanoindentation	1.553	1.82	0.1	10.1021/acs.chemmater.8b04800
N,N′-Diethyl-1,4,5,8-naphthalenetetracarboxylic diimide	O=C(C1=C2C(C3=O)=CC=C4C2=C(C(N(CC)C4=O)=O)C=C1)N3CC	Nanoindentation	1.56	16.1	0.44	10.1021/acs.chemmater.8b04800
N,N'-Din-propyl-1,4,5,8-naphthalenetetracarboxylic diimide	O=C(C1=C2C(C3=O)=CC=C4C2=C(C(N(CCC)C4=O)=O)C=C1)N3CCC	Nanoindentation	1.359	8.49	0.09	10.1021/acs.chemmater.8b04800
N,N'-Din-propyl-1,4,5,8-naphthalenetetracarboxylic diimide	O=C(C1=C2C(C3=O)=CC=C4C2=C(C(N(CCC)C4=O)=O)C=C1)N3CCC	Nanoindentation	1.359	10.18	0.24	10.1021/acs.chemmater.8b04800
OXACDH15-24	C(=O)(C(=O)O)O.O.O	Nanoindentation	1.639	18.81	0.96	10.1021/acs.molpharmaceut.9b00082
Caffeine-glutaric Form I	CN1C=NC2=C1C(=O)N(C(=O)N2C)C.C(CC(=O)O)CC(=O)O	Nanoindentation	1.45	18.02	0.04	10.1021/acs.cgd.0c01033
Caffeine-glutaric Form I	CN1C=NC2=C1C(=O)N(C(=O)N2C)C.C(CC(=O)O)CC(=O)O	Nanoindentation	1.45	17.6	0.49	10.1021/acs.cgd.0c01033
Caffeine-glutaric Form II	CN1C=NC2=C1C(=O)N(C(=O)N2C)C.C(CC(=O)O)CC(=O)O	Nanoindentation	1.482	19.35	0.57	10.1021/acs.cgd.0c01033
Caffeine-glutaric Form II	CN1C=NC2=C1C(=O)N(C(=O)N2C)C.C(CC(=O)O)CC(=O)O	Nanoindentation	1.482	18.6	0.35	10.1021/acs.cgd.0c01033
PETN	C(C(CO[N+](=O)[O-])(CO[N+](=O)[O-])CO[N+](=O)[O-])O[N+](=O)[O-]	Nanoindentation	1.778	15.2	2.4	10.3390/cryst10020126
246 TFBA	FC1=CC(F)=CC(F)=C1C(O)=O	Nanoindentation	1.759	19.2	2.6	10.3390/cryst10020126
Erythritol	C(C(C(CO)O)O)O	Nanoindentation	1.452	21.2	2.4	10.3390/cryst10020126
HFPT	OC(CC(O)(O)CC(F)(F)F)(O)CC(F)(F)F	Nanoindentation	1.941	6.3	0.4	10.3390/cryst10020126
N-BPFPO	FC1=C(NC(C(NC2=C(F)C(F)=C(F)C(F)=C2F)=O)=O)C(F)=C(F)C(F)=C1F	Nanoindentation	1.932	17.6	0.4	10.3390/cryst10020126
PFBA	NC(C1=C(F)C(F)=C(F)C(F)=C1F)=O	Nanoindentation	1.884	5.8	1.5	10.3390/cryst10020126
Sodium saccharin dihydrate (Freshly prepared)	C1=CC=C2C(=C1)C(=O)[N-]S2(=O)=O.O.O.[Na+]	Nanoindentation	1.661	18.4	0.063	10.1039/c1ce05656e
Sodium saccharin dihydrate (Freshly prepared)	C1=CC=C2C(=C1)C(=O)[N-]S2(=O)=O.O.O.[Na+]	Nanoindentation	1.661	15.88	0.057	10.1039/c1ce05656e
Sodium saccharin dihydrate (Atmospere for 35 hours)	C1=CC=C2C(=C1)C(=O)[N-]S2(=O)=O.O.O.[Na+]	Nanoindentation	1.661	21.2	1.06	10.1039/c1ce05656e
Sodium saccharin dihydrate (Atmospere for 36 hours)	C1=CC=C2C(=C1)C(=O)[N-]S2(=O)=O.O.O.[Na+]	Nanoindentation	1.661	16.35	0.921	10.1039/c1ce05656e
Caffeine 4-chloro-3-nitrobenzoic acid, methanol	CN1C=NC2=C1C(=O)N(C(=O)N2C)C.C1=CC(=C(C=C1C(=O)O)[N+](=O)[O-])Cl.CO	Nanoindentation	1.4796	76.86	1.3	10.1038/s41467-019-11657-0
Caffeine 4-chloro-3-nitrobenzoic acid, methanol	CN1C=NC2=C1C(=O)N(C(=O)N2C)C.C1=CC(=C(C=C1C(=O)O)[N+](=O)[O-])Cl.CO	Nanoindentation	1.4796	64.39	1.96	10.1038/s41467-019-11657-0
Voriconazole-HCl	C[C@@H](C1=NC=NC=C1F)[C@](CN2C=NC=N2)(C3=C(C=C(C=C3)F)F)O.Cl	Nanoindentation		19.41	0.13	10.1016/j.cossms.2016.05.011
Voriconazole-OXA Form I	C[C@@H](C1=NC=NC=C1F)[C@](CN2C=NC=N2)(C3=C(C=C(C=C3)F)F)O.C(=O)(C(=O)[O-])[O-]	Nanoindentation		5.95	0.1	10.1016/j.cossms.2016.05.011
Voriconazole-OXA Form II	C[C@@H](C1=NC=NC=C1F)[C@](CN2C=NC=N2)(C3=C(C=C(C=C3)F)F)O.C(=O)(C(=O)[O-])[O-]	Nanoindentation		8.29	0.25	10.1016/j.cossms.2016.05.011
Voriconazole-FUM	C[C@@H](C1=NC=NC=C1F)[C@](CN2C=NC=N2)(C3=C(C=C(C=C3)F)F)O.C(=CC(=O)O)C(=O)O	Nanoindentation		5.79	0.26	10.1016/j.cossms.2016.05.011
Voriconazole-PAB	C[C@@H](C1=NC=NC=C1F)[C@](CN2C=NC=N2)(C3=C(C=C(C=C3)F)F)O.C1=CC(=CC=C1C(=O)O)N	Nanoindentation		5.63	0.35	10.1016/j.cossms.2016.05.011
Voriconazole-PHB	C[C@@H](C1=NC=NC=C1F)[C@](CN2C=NC=N2)(C3=C(C=C(C=C3)F)F)O.C1=CC(=CC=C1C(=O)O)O	Nanoindentation		5.64	0.21	10.1016/j.cossms.2016.05.011
Testosterone propionate	CCC(=O)OC1CCC2C1(CCC3C2CCC4=CC(=O)CCC34C)C	Beam bending		3.16		10.1016/0032-5910(91)80176-J
Phenylbutazone	CCCCC1C(=O)N(N(C1=O)C2=CC=CC=C2)C3=CC=CC=C3	Beam bending		3.33		10.1016/0032-5910(91)80176-J
Stearic acid	CCCCCCCCCCCCCCCCCC(=O)O	Beam bending		3.84		10.1016/0032-5910(91)80176-J
Ibuprofen	CC(C)CC1=CC=C(C=C1)C(C)C(=O)O	Beam bending		4.07		10.1016/0032-5910(91)80176-J
Tolbutamide	CCCCNC(=O)NS(=O)(=O)C1=CC=C(C=C1)C	Beam bending		5.22		10.1016/0032-5910(91)80176-J
Aspirin	CC(=O)OC1=CC=CC=C1C(=O)O	Beam bending		7.45		10.1016/0032-5910(91)80176-J
Sulphadiazine	C1=CN=C(N=C1)NS(=O)(=O)C2=CC=C(C=C2)N	Beam bending		7.7		10.1016/0032-5910(91)80176-J
Caffeine	CN1C=NC2=C1C(=O)N(C(=O)N2C)C	Beam bending		8.73		10.1016/0032-5910(91)80176-J
Theophylline	CN1C2=C(C(=O)N(C1=O)C)NC=N2	Beam bending		12.93		10.1016/0032-5910(91)80176-J
Lactose	C(C1C(C(C(C(O1)OC2C(OC(C(C2O)O)O)CO)O)O)O)O	Beam bending		24.06		10.1016/0032-5910(91)80176-J
3-Isopropoxyphenylboronic acid catechol ester	CC(C)OC1=CC(B(O2)OC3=C2C=CC=C3)=CC=C1	Virgin break	1.26	0.00118		10.1039/c9sc05640h
Carbamazepine	C1=CC=C2C(=C1)C=CC3=CC=CC=C3N2C(=O)N	Nanoindentation	1.344	13.87	0.26	10.1039/d0ce01659d
Carbamazepine	C1=CC=C2C(=C1)C=CC3=CC=CC=C3N2C(=O)N	Nanoindentation	1.344	11.01	0.22	10.1039/d0ce01659d
Carbamazepine	C1=CC=C2C(=C1)C=CC3=CC=CC=C3N2C(=O)N	Nanoindentation	1.344	10.74	0.28	10.1039/d0ce01659d
5-Methyl-2-[(2-nitrophenyl)amino]-3-thiophenecarbonitrile YN	CC1=CC(=C(S1)NC2=CC=CC=C2[N+](=O)[O-])C#N	Nanoindentation	1.431	9.98	0.28	10.1021/acs.cgd.0c00521
5-Methyl-2-[(2-nitrophenyl)amino]-3-thiophenecarbonitrile ON	CC1=CC(=C(S1)NC2=CC=CC=C2[N+](=O)[O-])C#N	Nanoindentation	1.428	7.39	0.09	10.1021/acs.cgd.0c00521
DPH-HCl	CN(C)CCOC(C1=CC=CC=C1)C2=CC=CC=C2.Cl	Nanoindentation	1.222	11.91	3.03	10.1021/acs.cgd.7b01153
DPH-Cit	CN(C)CCOC(C1=CC=CC=C1)C2=CC=CC=C2.C(C(=O)O)C(CC(=O)O)(C(=O)O)O	Nanoindentation	1.304	9.54	0.87	10.1021/acs.cgd.7b01153
DPH-Sac	CN(C)CCOC(C1=CC=CC=C1)C2=CC=CC=C2.C1=CC=C2C(=C1)C(=O)NS2(=O)=O	Nanoindentation	1.319	9.5	3.46	10.1021/acs.cgd.7b01153
DPH-Acs	CN(C)CCOC(C1=CC=CC=C1)C2=CC=CC=C2.CC1=CC(=O)NS(=O)(=O)O1	Nanoindentation	1.351	8.59	0.59	10.1021/acs.cgd.7b01153
9,10-Dicyanoanthracene	C1=CC=C2C(=C1)C(=C3C=CC=CC3=C2C#N)C#N	Beam bending	1.34	0.6	0.2	10.1002/anie.201810514
N'-[(Z)-(3,5-Dichloro-2-hydroxyphenyl)methylideneamino]-N,N-dimethylmethanimidamide	OC1=C(Cl)C=C(Cl)C=C1/C=N/N=C/N(C)C	Beam bending	1.45	0.688		10.1002/ange.202011857
(Z)-4-(1-cyano-2-(4-(dimethylamino)phenyl)vinyl)benzonitrile	CN(C)C(C=C1)=CC=C1/C=C(C#N)/C2=CC=C(C#N)C=C2	Beam bending		0.905		10.1002/adom.202000959
N-benzylideneanilines derivative 1	ClC1=C(/N=C([H])/C2=CC(Br)=CC(Br)=C2O)C=C(Cl)C=C1	Beam bending	2.065	0.68		10.1002/anie.202002627
N-benzylideneanilines derivative 2	ClC1=C(/N=C([H])/C2=CC(Br)=CC(Br)=C2O)C(Cl)=CC=C1	Beam bending	2.043	0.57		10.1002/anie.202002627
N-benzylideneanilines derivative 3	[H]/C(C1=CC(Br)=CC(Br)=C1O)=N\C2=CC(Cl)=C(Cl)C=C2	Beam bending	2.107	1.03	0.04	10.1002/anie.202002627
Dithieno[3,2-a:2’,3’-c]phenazine	C12=NC(C(C=CS3)=C3C4=C5C=CS4)=C5N=C1C=CC=C2	Nanoindentation	1.311	5.83	0.62	10.1002/anie.202003820
Celecoxib Form III	CC1=CC=C(C2=CC(C(F)(F)F)=NN2C3=CC=C(S(=O)(N)=O)C=C3)C=C1	Nanoindentation	1.549	16.27	0.43	10.1021/acs.chemmater.9b00040
Tetrabutyl-n-phosphonium tetraphenylborate	[B-](C1=CC=CC=C1)(C2=CC=CC=C2)(C3=CC=CC=C3)C4=CC=CC=C4.CCCC[P+](CCCC)(CCCC)CCCC	Bending test	1.04	0.5		10.1039/c5sc04057d
Tetrabutyl-n-phosphonium tetraphenylborate	[B-](C1=CC=CC=C1)(C2=CC=CC=C2)(C3=CC=CC=C3)C4=CC=CC=C4.CCCC[P+](CCCC)(CCCC)CCCC	Bending test	1.04	1.43		10.1039/c5sc04057d
N-[[4-p-dimethylaminophenylazo]benzoyl]-1-phenylethylamine	[H][C@@](C)(NC(C1=CC=C(/N=N/C2=CC=C(N(C)C)C=C2)C=C1)=O)C3=CC=CC=C3	Bending test	1.235	3.8		10.1038/s41467-017-02549-2
L-Threoninium picrate	[NH3+][C@@H](C(C)O)C(O)=O.[O-]C1=C([N+]([O-])=O)C=C([N+]([O-])=O)C=C1[N+]([O-])=O	Nanoindentation		69.22		10.1039/c4ra09410g
MCC	COC(=O)NC1=CC(=C(C=C1)Cl)Cl	Nanoindentation		2.6		10.1039/C2CC32678G
Probenecid	CCCN(CCC)S(=O)(=O)C1=CC=C(C=C1)C(=O)O	Nanoindentation		3.9		10.1039/C2CC32678G
Phenacetin	CCOC1=CC=C(C=C1)NC(=O)C	Nanoindentation		2		10.1039/C2CC32678G
UK-370106	CC1=C(C=CC(=C1)CCCC(CC(=O)O)C(=O)NC(C(=O)NC(COC)C2=CC=CC=C2)C(C)(C)C)C3=CC=CC=C3	Nanoindentation		1		10.1039/C2CC32678G
Ibuprofen	CC(C)CC1=CC=C(C=C1)C(C)C(=O)O	Nanoindentation		1.26		10.1039/C2CC32678G
Ascorbic acid	C([C@@H]([C@@H]1C(=C(C(=O)O1)O)O)O)O	Nanoindentation		4.6		10.1039/C2CC32678G
Sucrose	C([C@@H]1[C@H]([C@@H]([C@H]([C@H](O1)O[C@]2([C@H]([C@@H]([C@H](O2)CO)O)O)CO)O)O)O)O	Nanoindentation		3.7		10.1039/C2CC32678G
Tartaric acid	C(C(C(=O)O)O)(C(=O)O)O	Nanoindentation		3.7		10.1039/C2CC32678G
L-Glutamic acid	C(CC(=O)O)[C@@H](C(=O)O)N	Nanoindentation		3.08	2.64	10.1039/c9ce00819e
Perylene TNB	C1=CC2=C3C(=C1)C4=CC=CC5=C4C(=CC=C5)C3=CC=C2.C1=C(C=C(C=C1[N+](=O)[O-])[N+](=O)[O-])[N+](=O)[O-]	forced resonance vibration method		7.77		10.1246/bcsj.40.2793
Coronene	C1=CC2=C3C4=C1C=CC5=C4C6=C(C=C5)C=CC7=C6C3=C(C=C2)C=C7	forced resonance vibration method		1.1		10.1246/bcsj.40.2793
Coronene TNB	C1=CC2=C3C4=C1C=CC5=C4C6=C(C=C5)C=CC7=C6C3=C(C=C2)C=C7.C1=C(C=C(C=C1[N+](=O)[O-])[N+](=O)[O-])[N+](=O)[O-]	forced resonance vibration method		9.99		10.1246/bcsj.40.2793
Acetylacetone Cu	CC(=O)CC(=O)C.[Cu]	forced resonance vibration method		2.87		10.1246/bcsj.40.2793
Triphenylene	C1=CC=C2C(=C1)C3=CC=CC=C3C4=CC=CC=C24	forced resonance vibration method		1.19		10.1246/bcsj.40.2793
Anthracene TNB	C1=CC=C2C=C3C=CC=CC3=CC2=C1.C1=C(C=C(C=C1[N+](=O)[O-])[N+](=O)[O-])[N+](=O)[O-]	forced resonance vibration method		12.4		10.1246/bcsj.40.2793
1,2,3,4-Dibenzanthracene	C1=CC=C2C=C3C4=CC=CC=C4C5=CC=CC=C5C3=CC2=C1	forced resonance vibration method		2.81		10.1246/bcsj.40.2793
Acidine I2	C[N+](C)(C)CC(=O)O.[Cl-].I-I	forced resonance vibration method		16.7		10.1246/bcsj.40.2793
Acetaminophen	CC(=O)NC1=CC=C(C=C1)O	Nanoindentation		1.7		10.1039/C2CC32678G
Fluconazole	C1=CC(=C(C=C1F)F)C(CN2C=NC=N2)(CN3C=NC=N3)O	Nanoindentation		2.8		10.1039/C2CC32678G
PHA-739521	C1=CC(=CC=C1C2=CC(=NN2C3=CC=C(C=C3)S(=O)(=O)N)C(F)(F)F)F	Nanoindentation		2.2		10.1039/C2CC32678G
Rubrene	C1=CC=C(C=C1)C2=C3C=CC=CC3=C(C4=C(C5=CC=CC=C5C(=C24)C6=CC=CC=C6)C7=CC=CC=C7)C8=CC=CC=C8	Brillouin light scattering (BLS)		14.1		10.1039/d0tc01676d
Rubrene	C1=CC=C(C=C1)C2=C3C=CC=CC3=C(C4=C(C5=CC=CC=C5C(=C24)C6=CC=CC=C6)C7=CC=CC=C7)C8=CC=CC=C8	Brillouin light scattering (BLS)		9.01		10.1039/d0tc01676d
Rubrene	C1=CC=C(C=C1)C2=C3C=CC=CC3=C(C4=C(C5=CC=CC=C5C(=C24)C6=CC=CC=C6)C7=CC=CC=C7)C8=CC=CC=C8	Brillouin light scattering (BLS)		7.7		10.1039/d0tc01676d
L-Phenylalanine L-phenylalaninium bromide	C1=CC=C(C=C1)CC(C(=O)O)N.O=C(O)C([NH3+])CC1=CC=CC=C1.[Br-]	Knoop microhardness measurements	1.465	31.319		10.1039/c4ce00718b
[1]benzothieno[3,2-b][1]- benzothiophene–tetracyanoquinodimethane bilayers	C1=CC=C2C(=C1)C3=C(S2)C4=CC=CC=C4S3.C1=CC(=C(C#N)C#N)C=CC1=C(C#N)C#N	Nanoindentation		8.98		10.1039/c7tc04316c
[1]benzothieno[3,2-b][1]- benzothiophene–tetracyanoquinodimethane bilayers	C1=CC=C2C(=C1)C3=C(S2)C4=CC=CC=C4S3.C1=CC(=C(C#N)C#N)C=CC1=C(C#N)C#N	Nanoindentation		11.04		10.1039/c7tc04316c
L-Pyroglutamic acid	C1CC(=O)NC1C(=O)O	Nanoindentation	1.444	3.1		10.1002/adma.201906216
DABCO-carbazole cocrystal	C1=CC=C2C(=C1)C3=CC=CC=C3N2.C1=C2C(=NC=N1)N=CN2	Nanoindentation	1.17	2.5		10.1002/adma.201906216
5-Fluoroisatin–picolinic acid	C1=CC2=C(C=C1F)C(=O)C(=O)N2.C1=CC=NC(=C1)C(=O)O	Nanoindentation	1563	1.61	0.421	10.1039/c9ce01659g
5-Fluoroisatin–dimethyl sulfoxide	C1=CC2=C(C=C1F)C(=O)C(=O)N2.CS(=O)C	Nanoindentation	1525	21.57	3.1	10.1039/c9ce01659g
Aspirin (Macro)	CC(=O)OC1=CC=CC=C1C(=O)O	Nanoindentation		2.4	0.4	10.1039/c8ce00764k
Aspirin (Macro)	CC(=O)OC1=CC=CC=C1C(=O)O	Nanoindentation		2.6	0.3	10.1039/c8ce00764k
Aspirin (Nanometer)	CC(=O)OC1=CC=CC=C1C(=O)O	Nanoindentation		0.55	0.15	10.1039/c8ce00764k
N-3,5-di-tert-butylsalicylidene-1-phenylethylamine (S)	CC(C)(C)C1=C(O)C(/C=N/[C@H](C2=CC=CC=C2)C)=CC(C(C)(C)C)=C1	Beam bending	1.02	0.76		10.1021/cg400675r
N-3,5-di-tert-butylsalicylidene-1-phenylethylamine (rac)	CC(C)(C)C1=C(O)C(/C=N/[C@H](C2=CC=CC=C2)C)=CC(C(C)(C)C)=C1.CC(C)(C)C1=C(O)C(/C=N/[C@@H](C2=CC=CC=C2)C)=CC(C(C)(C)C)=C1	Beam bending	1.044	2.6		10.1021/cg400675r
Anhydrous ipratropium bromide	CC(C)[N+]1(C2CCC1CC(C2)OC(=O)C(CO)C3=CC=CC=C3)C.[Br-]	Nanoindentation		3.2	0.5	10.1111/j.2042-7158.2012.01522.x
Monohydrate ipratropium bromide	CC(C)[N+]1(C2CCC1CC(C2)OC(=O)C(CO)C3=CC=CC=C3)C.O.[Br-]	Nanoindentation		3.68	0.73	10.1111/j.2042-7158.2012.01522.x
N–benzyl-2-methyl-4-nitroaniline	CC1=C(C=CC(=C1)[N+](=O)[O-])NCC2=CC=CC=C2	Knoop hardness test		2.49		10.1088/1757-899X/73/1/012033
Bis(2,4-pentanedione)copper(II) (Berkovich)	CC2=CC(C)O[Cu]1(OC(=CC(C)O1)C)O2	Nanoindentation		6.9		10.1039/c9cp04542b
Bis(2,4-pentanedione)copper(II) (Spherical)	CC2=CC(C)O[Cu]1(OC(=CC(C)O1)C)O2	Nanoindentation		3.8		10.1039/c9cp04542b
Caffeine–4-chloro-3-nitrobenzoic acid (Form I)	CN1C=NC2=C1C(=O)N(C(=O)N2C)C.C1=CC(=C(C=C1C(=O)O)[N+](=O)[O-])Cl	Nanoindentation		7.86	0.028	10.1039/c3ce42008f
Caffeine–4-chloro-3-nitrobenzoic acid (Form II)	CN1C=NC2=C1C(=O)N(C(=O)N2C)C.C1=CC(=C(C=C1C(=O)O)[N+](=O)[O-])Cl	Nanoindentation		6.715	0.009	10.1039/c3ce42008f
Caffeine–4-chloro-3-nitrobenzoic acid (Form II)	CN1C=NC2=C1C(=O)N(C(=O)N2C)C.C1=CC(=C(C=C1C(=O)O)[N+](=O)[O-])Cl	Nanoindentation		4.92	0.005	10.1039/c3ce42008f
2-(Methylthio)nicotinic acid	CSC1=C(C=CC=N1)C(=O)O	Nanoindentation		15		10.1039/b505103g
N-(4-ethynylphenyl)-3- fluoro-4-(trifluoromethyl) benzamide	O=C(NC1=CC(C#C)=CC=C1)C2=CC=C(C(F)(F)F)C(F)=C2	shearing from the side	1.521	5.57		10.1039/d0cc05904h
N-(4-ethynylphenyl)-3- fluoro-4-(trifluoromethyl) benzamide	O=C(NC1=CC(C#C)=CC=C1)C2=CC=C(C(F)(F)F)C(F)=C2	shearing from the side	1.521	0.135		10.1039/d0cc05904h
N-(4-ethynylphenyl)-3- fluoro-4-(trifluoromethyl) benzamide.1	O=C(NC1=CC(C#C)=CC=C1)C2=CC=C(C(F)(F)F)C(F)=C2	Nanoindentation	1.521	0.65	0.12	10.1039/d0cc05904h
N-(4-ethynylphenyl)-3- fluoro-4-(trifluoromethyl) benzamide.2	O=C(NC1=CC(C#C)=CC=C1)C2=CC=C(C(F)(F)F)C(F)=C2	Nanoindentation	1.521	1.75	0.37	10.1039/d0cc05904h
N-(4-ethynylphenyl)-3- fluoro-4-(trifluoromethyl) benzamide.3	O=C(NC1=CC(C#C)=CC=C1)C2=CC=C(C(F)(F)F)C(F)=C2	Nanoindentation	1.521	2.22	0.21	10.1039/d0cc05904h
N-(4-ethynylphenyl)-3- fluoro-4-(trifluoromethyl) benzamide.4	O=C(NC1=CC(C#C)=CC=C1)C2=CC=C(C(F)(F)F)C(F)=C2	Nanoindentation	1.521	3.97	0.45	10.1039/d0cc05904h
Dithieno[3,2-a:2’,3’-c]phenazine	C1(N=C(C(C=CS2)=C2C3=C4C=CS3)C4=N5)=C5C=CC=C1	Nanoindentation	1.311	5.83	0.62	10.1002/ange.202003820
PtCl2(4,4′-Dichloro-2,2′-bipyridine) MeCN	ClC1C=C(C2=CC(Cl)C=CN2[Pt]3(Cl)Cl)N3C=C1.CN	vibrating reed method	2.339	0.62		10.1039/d1ce00459j
PtCl2(4,4′-Dichloro-2,2′-bipyridine) MeCN	ClC1C=C(C2=CC(Cl)C=CN2[Pt]3(Cl)Cl)N3C=C1.CN	vibrating reed method	2.339	1.1		10.1039/d1ce00459j
1,2-bis(2,4-dimethyl-5-phenyl-3-thienyl)perfluorocyclopentene.open ring (macrocrystal)	CC1=C(SC(=C1C2=C(C(C(C2(F)F)(F)F)(F)F)C3=C(SC(=C3C)C4=CC=CC=C4)C)C)C5=CC=CC=C5	Nanoindentation		4.4	0.4	10.1021/acs.nanolett.0c02631
1,2-bis(2,4-dimethyl-5-phenyl-3-thienyl)perfluorocyclopentene.open ring (nanowire single crystal)	CC1=C(SC(=C1C2=C(C(C(C2(F)F)(F)F)(F)F)C3=C(SC(=C3C)C4=CC=CC=C4)C)C)C5=CC=CC=C5	Nanoindentation		1.4	0.1	10.1021/acs.nanolett.0c02631
1,2-bis(2,4-dimethyl-5-phenyl-3-thienyl)perfluorocyclopentene.open ring (amorphous film)	CC1=C(SC(=C1C2=C(C(C(C2(F)F)(F)F)(F)F)C3=C(SC(=C3C)C4=CC=CC=C4)C)C)C5=CC=CC=C5	Nanoindentation		0.34	0.04	10.1021/acs.nanolett.0c02631
1,2-bis(2,4-dimethyl-5-phenyl-3-thienyl)perfluorocyclopentene.close ring (macrocrystal)	FC1(F)C(F)(F)C(F)(F)C2=C3C(C4(C)SC(C5=CC=CC=C5)=C(C)C4=C21)(C)SC(C6=CC=CC=C6)=C3C	Nanoindentation		4.5	0.5	10.1021/acs.nanolett.0c02631
1,2-bis(2,4-dimethyl-5-phenyl-3-thienyl)perfluorocyclopentene.close ring (nanowire single crystal)	FC1(F)C(F)(F)C(F)(F)C2=C3C(C4(C)SC(C5=CC=CC=C5)=C(C)C4=C21)(C)SC(C6=CC=CC=C6)=C3C	Nanoindentation		1.3	0.15	10.1021/acs.nanolett.0c02631
1,2-bis(2,4-dimethyl-5-phenyl-3-thienyl)perfluorocyclopentene.close ring (amorphous film)	FC1(F)C(F)(F)C(F)(F)C2=C3C(C4(C)SC(C5=CC=CC=C5)=C(C)C4=C21)(C)SC(C6=CC=CC=C6)=C3C	Nanoindentation		0.35	0.03	10.1021/acs.nanolett.0c02631
Uric acid	C12=C(NC(=O)N1)NC(=O)NC2=O	Nanoindentation	1.852	17.73	2.32	10.1021/acs.chemmater.0c00433
Uric acid-Methylene blue	C12=C(NC(=O)N1)NC(=O)NC2=O.CN(C)C1=CC2=C(C=C1)N=C3C=CC(=[N+](C)C)C=C3S2.[Cl-]	Nanoindentation		11.05	2.83	10.1021/acs.chemmater.0c00433
Uric acid-Methylene blue	C12=C(NC(=O)N1)NC(=O)NC2=O.CN(C)C1=CC2=C(C=C1)N=C3C=CC(=[N+](C)C)C=C3S2.[Cl-]	Nanoindentation		12.79	2.71	10.1021/acs.chemmater.0c00433
Uric acid-Bismarck brown Y	C12=C(NC(=O)N1)NC(=O)NC2=O.C1=CC(=CC(=C1)N=NC2=C(C=C(C=C2)N)N)N=NC3=C(C=C(C=C3)N)N.Cl.Cl	Nanoindentation		13.2	4.98	10.1021/acs.chemmater.0c00433
Uric acid-Bismarck brown Y	C12=C(NC(=O)N1)NC(=O)NC2=O.C1=CC(=CC(=C1)N=NC2=C(C=C(C=C2)N)N)N=NC3=C(C=C(C=C3)N)N.Cl.Cl	Nanoindentation		10.03	5.93	10.1021/acs.chemmater.0c00433
Uric acid-Bismarck brown Y	C12=C(NC(=O)N1)NC(=O)NC2=O.C1=CC(=CC(=C1)N=NC2=C(C=C(C=C2)N)N)N=NC3=C(C=C(C=C3)N)N.Cl.Cl	Nanoindentation		12.19	3.82	10.1021/acs.chemmater.0c00433
Uric acid-Bismarck brown Y	C12=C(NC(=O)N1)NC(=O)NC2=O.C1=CC(=CC(=C1)N=NC2=C(C=C(C=C2)N)N)N=NC3=C(C=C(C=C3)N)N.Cl.Cl	Nanoindentation		8.82	5.36	10.1021/acs.chemmater.0c00433
Uric acid-Bismarck brown Y	C12=C(NC(=O)N1)NC(=O)NC2=O.C1=CC(=CC(=C1)N=NC2=C(C=C(C=C2)N)N)N=NC3=C(C=C(C=C3)N)N.Cl.Cl	Nanoindentation		14.6	5.18	10.1021/acs.chemmater.0c00433
Uric acid-Bismarck brown Y	C12=C(NC(=O)N1)NC(=O)NC2=O.C1=CC(=CC(=C1)N=NC2=C(C=C(C=C2)N)N)N=NC3=C(C=C(C=C3)N)N.Cl.Cl	Nanoindentation		15.33	5.28	10.1021/acs.chemmater.0c00433
(Z)-4-(1- cyano-2-(4-(dimethylamino)phenyl)vinyl)benzonitrile	CN(C)C(C=C1)=CC=C1/C=C(C#N)/C2=CC=C(C#N)C=C2	Beam bending	1.241	0.905	0.09	10.1002/ange.201914026
9,10-Dicyanoanthracene	C1=CC=C2C(=C1)C(=C3C=CC=CC3=C2C#N)C#N	three-point flexural test	1.34	0.6	0.2	10.1002/ange.201810514
3,4-Di­methoxycinnamic acid FormII	COC1=C(C=C(C=C1)C=CC(=O)O)OC	Nanoindentation	1.37	9.57	0.13	10.1107/S2052252515017297
3,4-Di­methoxycinnamic acid FormI	COC1=C(C=C(C=C1)C2C(C(C2C(=O)O)C3=CC(=C(C=C3)OC)OC)C(=O)O)OC	Nanoindentation	1.405	8.42	0.28	10.1107/S2052252515017297
Resorcinol/trans-1,2-bis(4-pyridyl)ethylene	OC1=C(O)C=CC=C1.C1=CN=CC=C1C=CC2=CC=NC=C2	Nanoindentation		1.6	0.35	10.1021/jacs.5b07873
Resorcinol/trans-1,2-bis(4-pyridyl)ethylene	OC1=C(O)C=CC=C1.C1=CN=CC=C1C=CC2=CC=NC=C2	Nanoindentation		1.25	0.35	10.1021/jacs.5b07873
4,6-Di-Cl-resorcinol/trans-1,2-bis(4-pyridyl)ethylene	OC1=C(O)C=C(Cl)C(Cl)=C1.C1=CN=CC=C1C=CC2=CC=NC=C2	Nanoindentation		0.27	0.025	10.1021/jacs.5b07873
4,6-Di-Cl-resorcinol/trans-1,2-bis(4-pyridyl)ethylene	OC1=C(O)C=C(Cl)C(Cl)=C1.C1=CN=CC=C1C=CC2=CC=NC=C2	Nanoindentation		0.235	0.025	10.1021/jacs.5b07873
4,6-Di-Br-resorcinol/trans-1,2-bis(4-pyridyl)ethylene	OC1=C(O)C=C(Br)C(Br)=C1.C1=CN=CC=C1C=CC2=CC=NC=C2	Nanoindentation	1.727	0.12	0.015	10.1021/jacs.5b07873
4,6-Di-Br-resorcinol/trans-1,2-bis(4-pyridyl)ethylene	OC1=C(O)C=C(Br)C(Br)=C1.C1=CN=CC=C1C=CC2=CC=NC=C2	Nanoindentation	1.727	0.095	0.01	10.1021/jacs.5b07873
4,6-Di-I-resorcinol/trans-1,2-bis(4-pyridyl)ethylene	OC1=C(O)C=C(I)C(I)=C1.C1=CN=CC=C1C=CC2=CC=NC=C2	Nanoindentation	1.977	0.054	0.003	10.1021/jacs.5b07873
4,6-Di-I-resorcinol/trans-1,2-bis(4-pyridyl)ethylene	OC1=C(O)C=C(I)C(I)=C1.C1=CN=CC=C1C=CC2=CC=NC=C2	Nanoindentation	1.977	0.04	0.002	10.1021/jacs.5b07873
3′,4′-Dimethyl-4-(dimethylamino)azobenzene	CC1=C(C=C(C=C1)N=NC2=CC=C(C=C2)N(C)C)C	Nanoindentation	1.246	1.7	0.1	10.1021/acs.cgd.7b00288
5-Cyanoresorcinol Trans-1,2-bis(4-pyridyl)ethylene (before photo-reaction)	C1=C(C=C(C=C1O)O)C#N.C1=CN=CC=C1C=CC2=CC=NC=C2	Nanoindentation	1.277	0.26	0.02	10.1002/ange.201102370
5-Cyanoresorcinol Trans-1,2-bis(4-pyridyl)ethylene (after photo-reaction)	C1=C(C=C(C=C1O)O)C#N.C1=CN=CC=C1C=CC2=CC=NC=C2	Nanoindentation	1.278	0.15	0.012	10.1002/ange.201102370
Acetaminophen	CC(=O)NC1=CC=C(C=C1)O	Microindentation		8.4	0.3	10.1007/BF00721518
Anthracene	C1=CC=C2C=C3C=CC=CC3=CC2=C1	Nanoindentation		10.39		10.1039/b503208n
Anthracene	C1=CC=C2C=C3C=CC=CC3=CC2=C1	Nanoindentation		13.64		10.1039/b503208n
BF2dbm(tBu)2	F[B-]1(F)OC(C2=CC=C(C(C)(C)C)C=C2)=CC(C3=CC=C(C(C)(C)C)C=C3)=[O+]1	Nanoindentation	1.545	0.369	0.008	10.1107/S2052252515015134
BF2dbm(OMe)2	F[B-]1(F)OC(C2=CC=C(OC)C=C2)=CC(C3=CC=C(OC)C=C3)=[O+]1	Nanoindentation	1.603	10.864	0.249	10.1107/S2052252515015134
BF2dbmOMe	F[B-]1(F)OC(C2=CC=C(OC)C=C2)=CC(C3=CC=CC=C3)=[O+]1	Nanoindentation	1.482	8.62	0.176	10.1107/S2052252515015134
Chlorpropamide Form α	CCCNC(=O)NS(=O)(=O)C1=CC=C(C=C1)Cl	Nanoindentation	1.45	6	1.7	10.1016/j.ejps.2017.06.013
Chlorpropamide Form α	CCCNC(=O)NS(=O)(=O)C1=CC=C(C=C1)Cl	Nanoindentation	1.45	2.45	0.55	10.1016/j.ejps.2017.06.013
Chlorpropamide Form β	CCCNC(=O)NS(=O)(=O)C1=CC=C(C=C1)Cl	Nanoindentation	1.389	7.1	2.6	10.1016/j.ejps.2017.06.013
Chlorpropamide Form γ	CCCNC(=O)NS(=O)(=O)C1=CC=C(C=C1)Cl	Nanoindentation	1.416	7.5	1.3	10.1016/j.ejps.2017.06.013
Cyclotetramethylene tetranitramine	C1N(CN(CN(CN1[N+](=O)[O-])[N+](=O)[O-])[N+](=O)[O-])[N+](=O)[O-]	Nanoindentation		23.45	1.91	10.3390/cryst7110335
Hexahydro-1,3,5-trinitro-s-triazine	C1N(CN(CN1[N+](=O)[O-])[N+](=O)[O-])[N+](=O)[O-]	Nanoindentation		21.4	0.64	10.1021/acs.jpca.5b04876
Difluoroboron avobenzone FromI	F[B-]1(F)OC(C2=CC=C(C(C)(C)C)C=C2)=CC(C3=CC=C(OC)C=C3)=[O+]1	Nanoindentation		10.6	0.35	10.1002/adfm.201201896
Difluoroboron avobenzone FromI	F[B-]1(F)OC(C2=CC=C(C(C)(C)C)C=C2)=CC(C3=CC=C(OC)C=C3)=[O+]1	Nanoindentation		7.4	0.31	10.1002/adfm.201201896
Difluoroboron avobenzone FromI	F[B-]1(F)OC(C2=CC=C(C(C)(C)C)C=C2)=CC(C3=CC=C(OC)C=C3)=[O+]1	Nanoindentation		13.2	0.16	10.1002/adfm.201201896
Difluoroboron avobenzone FromII	F[B-]1(F)OC(C2=CC=C(C(C)(C)C)C=C2)=CC(C3=CC=C(OC)C=C3)=[O+]1	Nanoindentation		5.6	0.46	10.1002/adfm.201201896
Famotidine Form A	C1=C(N=C(S1)N=C(N)N)CSCCC(=NS(=O)(=O)N)N	Nanoindentation	1.5602	20.1	2.3	10.1016/j.ijpharm.2014.06.047
Famotidine Form B	C1=C(N=C(S1)N=C(N)N)CSCCC(=NS(=O)(=O)N)N	Nanoindentation	1.5389	19.5	0.4	10.1016/j.ijpharm.2014.06.047
Nifedipine Form α	CC1=C(C(C(=C(N1)C)C(=O)OC)C2=CC=CC=C2[N+](=O)[O-])C(=O)OC	Nanoindentation	1.3873	12.3	5	10.1016/j.ijpharm.2014.06.047
Olanzapine Form I	CC1=CC2=C(S1)NC3=CC=CC=C3N=C2N4CCN(CC4)C	Nanoindentation	1.2964	14.4	1.7	10.1016/j.ijpharm.2014.06.047
Piroxicam Form I	CN1C(=C(C2=CC=CC=C2S1(=O)=O)O)C(=O)NC3=CC=CC=N3	Nanoindentation	1.4713	12.1	0.9	10.1016/j.ijpharm.2014.06.047
Felodipine From I	CCOC(=O)C1=C(NC(=C(C1C2=C(C(=CC=C2)Cl)Cl)C(=O)OC)C)C	Nanoindentation		12.81	0.19	10.1002/anie.201406898
Felodipine From II	CCOC(=O)C1=C(NC(=C(C1C2=C(C(=CC=C2)Cl)Cl)C(=O)OC)C)C	Nanoindentation		6.24	0.18	10.1002/anie.201406898
Felodipine From II	CCOC(=O)C1=C(NC(=C(C1C2=C(C(=CC=C2)Cl)Cl)C(=O)OC)C)C	Nanoindentation		6.19	0.25	10.1002/anie.201406898
Felodipine From III	CCOC(=O)C1=C(NC(=C(C1C2=C(C(=CC=C2)Cl)Cl)C(=O)OC)C)C	Nanoindentation		10.47	0.19	10.1002/anie.201406898
Idoxuridine	C1C(C(OC1N2C=C(C(=O)NC2=O)I)CO)O	Nanoindentation		21.6	2	10.3390/cryst7110335
L-Prolinium tartrate	C1CC([NH2+]C1)C(=O)O.C(C(C(=O)[O-])O)(C(=O)[O-])O	Nanoindentation		19.47		10.1039/c4ce01232a
Naphthalene-2,3-diyl-bis(4-fluorobenzoate)	O=C(C1=CC=C(F)C=C1)OC2=CC3=CC=CC=C3C=C2OC(C4=CC=C(F)C=C4)=O	Nanoindentation	1.36	7	0.18	10.1002/chem.201705586
3-NBA	OC(C1=CC=CC([N+]([O-])=O)=C1)=O	Nanoindentation	1.546	9.8		10.1039/c7ce00238f
4-NBA	OC(C1=CC=C([N+]([O-])=O)C=C1)=O	Nanoindentation	1.601	12		10.1039/c7ce00238f
Cl-NBA	OC(C1=CC=C(Cl)C([N+]([O-])=O)=C1)=O	Nanoindentation	1.726	13		10.1039/c7ce00238f
Br-NBA	OC(C1=CC=C(Br)C([N+]([O-])=O)=C1)=O	Nanoindentation	2.052	13.5		10.1039/c7ce00238f
Me-NBA	OC(C1=CC=C(C)C([N+]([O-])=O)=C1)=O	Nanoindentation	1.479	11.6		10.1039/c7ce00238f
Methyl-PABA	O=C(OC)C1=CC=C(N)C=C1	Nanoindentation	1.38	12.7		10.1021/acs.molpharmaceut.6b00598
Ethyl-PABA	O=C(OCC)C1=CC=C(N)C=C1	Nanoindentation	1.28	6		10.1021/acs.molpharmaceut.6b00598
Butyl-PABA	O=C(OCCCC)C1=CC=C(N)C=C1	Nanoindentation	1.24	7.1		10.1021/acs.molpharmaceut.6b00598
Propyl-PABA	O=C(OCCC)C1=CC=C(N)C=C1	Nanoindentation	1.29	7.9		10.1021/acs.molpharmaceut.6b00598
Paracetamol	CC(=O)NC1=CC=C(C=C1)O	Nanoindentation		10.9		10.1023/A:1011005016677
Terephthalic acid	C1=CC(=CC=C1C(=O)O)C(=O)O	Nanoindentation	1.58	6.2	0.7	10.1021/jacs.6b07406
Theophylline	CN1C2=C(C(=O)N(C1=O)C)NC=N2	Nanoindentation	1.481	9	2	10.1021/acs.cgd.7b01339
Theophylline-Acetaminophen	CN1C2=C(C(=O)N(C1=O)C)NC=N2.CC(=O)NC1=CC=C(C=C1)O	Nanoindentation	1.39	8.7	1.9	10.1021/acs.cgd.7b01339
Theophylline-4-fluoro-3-nitrobenzoic acid	CN1C2=C(C(=O)N(C1=O)C)NC=N2.C1=CC(=C(C=C1C(=O)O)[N+](=O)[O-])F	Nanoindentation	1.568	8.4	1.8	10.1021/acs.cgd.7b01339
Theophylline-p-aminobenzoic acid	CN1C2=C(C(=O)N(C1=O)C)NC=N2.C1=CC(=CC=C1C(=O)O)N	Nanoindentation	1.459	10.3	2.3	10.1021/acs.cgd.7b01339
Uric acid	C12=C(NC(=O)N1)NC(=O)NC2=O	Nanoindentation		9.2		10.1016/S0022-5347(05)67419-8
Anthracene	C1=CC=C2C=C3C=CC=CC3=CC2=C1	Nanoindentation		9.2	0.2	10.1002/anie.202113988
Aspirin Form1	CC(=O)OC1=CC=CC=C1C(=O)O	Nanoindentation		9.57	0.201	10.1002/anie.202113988
L-Arabinose	C1[C@@H]([C@@H]([C@H](C(O1)O)O)O)O	Nanoindentation		25	0.6	10.1002/anie.202113988
L-Ascorbic acid	C([C@@H]([C@@H]1C(=C(C(=O)O1)O)O)O)O	Nanoindentation		36.5	4	10.1002/anie.202113988
L-Lyxose	C([C@@H]([C@H]([C@H](C=O)O)O)O)O	Nanoindentation		13.6	2	10.1002/anie.202113988
D-Mannitol	C([C@H]([C@H]([C@@H]([C@@H](CO)O)O)O)O)O	Nanoindentation		18.4	1.2	10.1002/anie.202113988
Oxalic acid dihydrate	C(=O)(C(=O)O)O.O.O	Nanoindentation		19.5	4.4	10.1002/anie.202113988
Succinic acid	C(CC(=O)O)C(=O)O	Nanoindentation		9.2	3.1	10.1002/anie.202113988
Sucrose	C(C1C(C(C(C(O1)OC2(C(C(C(O2)CO)O)O)CO)O)O)O)O	Nanoindentation		27.317	0.86	10.1002/anie.202113988
Sucrose	C(C1C(C(C(C(O1)OC2(C(C(C(O2)CO)O)O)CO)O)O)O)O	Nanoindentation		33.583	0.733	10.1002/anie.202113988
Xylitol	C([C@H](C([C@H](CO)O)O)O)O	Nanoindentation		21.1	4.1	10.1002/anie.202113988
D-Xylose	C1[C@H]([C@@H]([C@H](C(O1)O)O)O)O	Nanoindentation		28	2.3	10.1002/anie.202113988
L-threonine	C[C@H]([C@@H](C(=O)O)N)O	Nanoindentation		40.95	1.03	10.1002/anie.202113988
L-threonine	C[C@H]([C@@H](C(=O)O)N)O	Nanoindentation		25.33	1.37	10.1002/anie.202113988
L-threonine	C[C@H]([C@@H](C(=O)O)N)O	Nanoindentation		32.57	0.67	10.1002/anie.202113988
